# Supplementary material for: Transcriptional Immune Signatures of Alveolar Macrophages and the Impact of the NLRP3 Inflammasome on Porcine Reproductive and Respiratory Syndrome Virus (PRRSV) Replication
Source: MDPI journal article supplement (doi:10.3390/v12111299), 2020-11-12
Supplement: s1 [file s1]

**Figure S1**

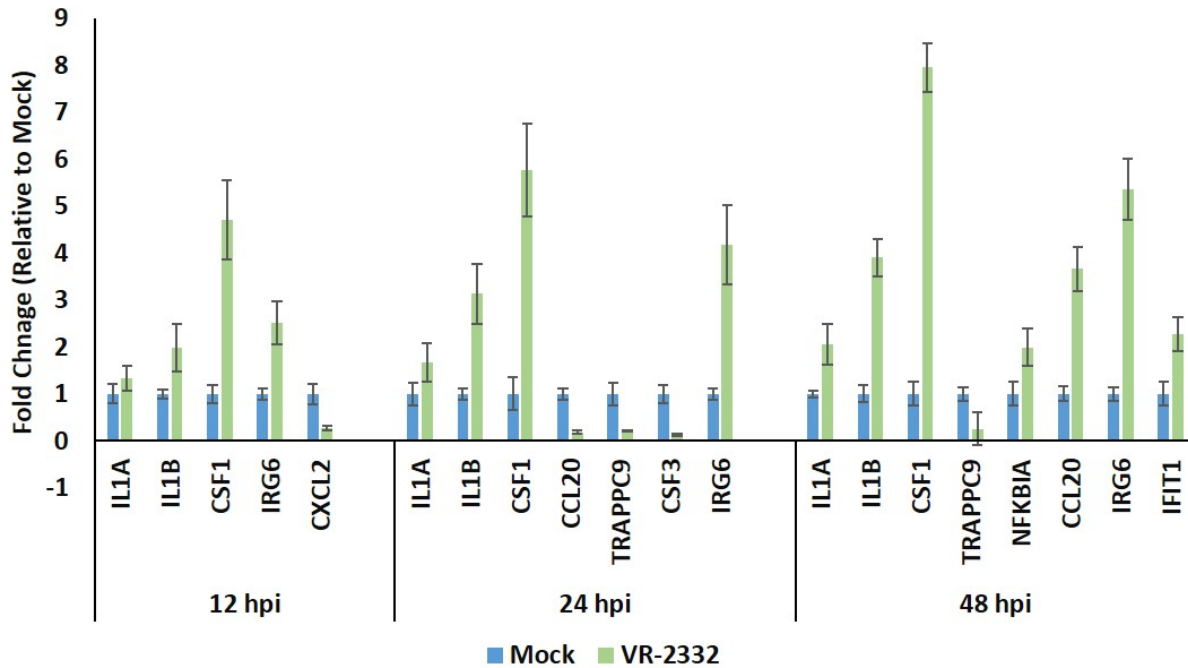

**Figure S1. Expression pattern confirmation for a random selection of differentially expressed genes from RNA-seq via RT-qPCR.** PAMs (n=3) were either infected with PRRSV strain VR-2332 or mock infected and total RNA was collected at 12h, 24h, or 48h and subjected to RT-qPCR. All values are provided as the fold change in PRRSV-infected PAMs relative to mock-infected PAMs.
