# Supplementary material for: Transcriptional Immune Signatures of Alveolar Macrophages and the Impact of the NLRP3 Inflammasome on Porcine Reproductive and Respiratory Syndrome Virus (PRRSV) Replication
Source: MDPI journal article supplement (doi:10.3390/v12111299), 2020-11-12
Supplement: s1 [file s1]

**Figure S2**

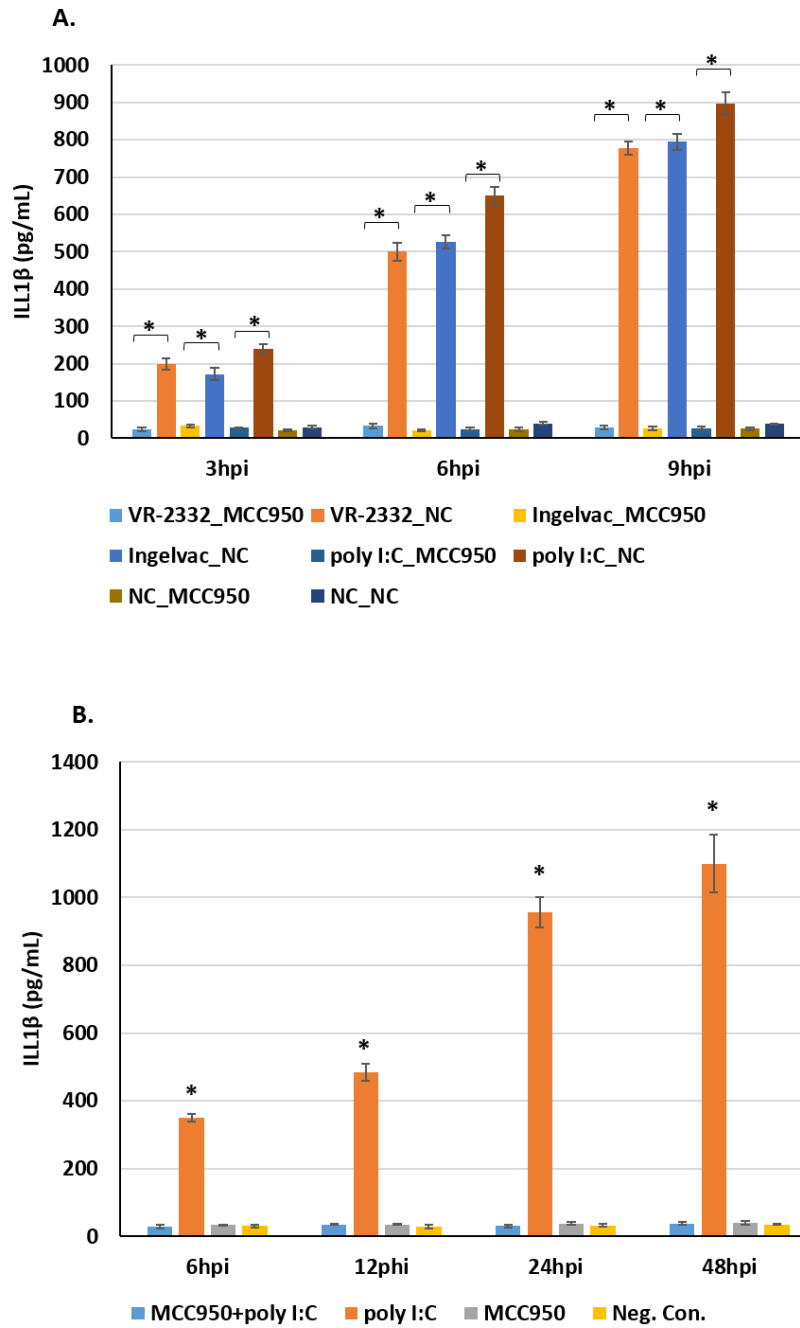

**Figure S2. Confirmation of MCC950's ability to prevent IL1B secretion in porcine alveolar macrophages.** To confirm the ability of MCC950 to prevent the release of IL1B from PAMs *in vitro*, the levels of IL1B secreted into the cell culture supernatants were measured using an enzyme-linked immunosorbent assay kit (ELISA) for porcine IL1B (MyBioSource, San Diego,

CA, USA), following the manufacturer's instructions. Each sample was assayed in duplicate. Values are provided as average levels (pg/mL) of mature IL1B present in culture supernatants, error bars denote SD for each group. Panel (A.) represented secreted IL1B levels in the PAM cultures from the first inflammasome inhibition experiment (Figure 8 in the text) and Panel (B.) represents IL1B levels in the PAM cultures from the second inflammasome inhibition study (Figure 9 in the text). (A.) PAMs (n=3) were treated with the NLRP3 inflammasome inhibitor MCC950 at a final concentration of 10 $\mu$ M or mock-treated. One hour post-treatment PAMs were either infected with VR-2332 (M.O.I. 1), Ingelvac MLV (M.O.I.1), transfected with 1 $\mu$ g of poly I:C (known NLRP3 inflammasome activator) or mock infected. \*significantly (p<0.05) different expression IL1B levels between time-matched, MCC950-treated PAMs and mock-treated PAMs with same viral/poly I:C treatment. Panel legend: VR-2332\_MCC950: PAMs treated with 10 $\mu$ M MCC950 for 1hr then infected with VR-2332 (M.O.I. 1). VR-2332\_NC: Mock-treated PAMs infected with VR-2332 (M.O.I. 1). Ingelvac MLV\_MCC950: PAMs treated with 10 $\mu$ M MCC950 for 1hr then infected with Ingelvac MLV (M.O.I. 1). Ingelvac MLV\_NC: Mock-treated PAMs infected with Ingelvac MLV (M.O.I. 1). poly I:C\_MCC950: PAMs treated with 10 $\mu$ M MCC950 for 1hr then transfected with poly I:C (1 $\mu$ g). poly I:C\_NC: Mock-treated PAMs transfected with poly I:C (1 $\mu$ g). NC\_NC: Mock-treated, mock-infected PAMs. (B.) PAMs (n=3) were treated with the NLRP3 inflammasome inhibitor MCC950 at a final concentration of 10 $\mu$ M or mock-treated. One hour post-treatment PAMs were transfected with 1 $\mu$ g of poly I:C (known NLRP3 inflammasome activator) or mock transfected. Twenty-four hours post-transfection cell culture supernatants were collected and used to treat a second group of pig-matched PAMs. Panel legend: MCC950+poly I:C: PAMs treated with cell culture supernatants from PAMs subjected to MCC950 treatment and poly I:C transfection. poly I:C: PAMs treated with cell culture supernatants from PAMs subjected poly I:C transfection only. MCC950: PAMs treated with cell culture supernatants from PAMs subjected to MCC950 treatment only. Neg. Con.: PAMs treated with cell culture supernatants from PAMs subjected to mock treatment/transfection. \*PAMs transfected with poly I:C alone had significantly higher (p<0.05) IL1B levels than the other groups.
