# Supplementary material for: Transcriptional Immune Signatures of Alveolar Macrophages and the Impact of the NLRP3 Inflammasome on Porcine Reproductive and Respiratory Syndrome Virus (PRRSV) Replication
Source: Viruses. 2020 Nov 12;12(11):1299. doi: 10.3390/v12111299 (PMC7696364; doi:10.3390/v12111299)
Supplement: Supplementary file 1 [file viruses-12-01299-s001.zip › Table S1.xlsx]

## Sheet: Sheet1
Supplemental Table 1. Primers used in this study
Primer	Sequence (5' to 3')
NLRP3-Forward	GCTCTTGGAGACATCGGAGT
NLRP3-Reverse	AGGCTGCAGTTCTCTAATTCCAA
P2RX7-Forward	CCTACTTTGGTTTGGCCACTG
P2RX7-Reverse	ACAGCACTTGCAACAGGGATA
CTSB-Forward	ATCTCTGACCGGATCTGCATC
CTSB-Reverse	GCCACCGTTACAGCCATCC
NEK7-Forward	CACTATTCGGAGGAGCTACGG
NEK7-Reverse	ATCCTCTTGGCCACGTCGTA
CASP1-Forward	AATCTCACCGCTTCGGACA
CASP1-Reverse	GCCAGCCTGGATTCCATGAG
PYCARD-Forward	CAAACCAGCACTGCACTTCG
PYCARD-Reverse	CCTGGTACTGCTCTTCCGTC
TLR4-Forward	CGTGCAGGTGGTTCCTAACA
TLR4-Reverse	CAGGTAGTTAAAGCTCAGGTCCA
IL1A-Forward	ATGATGCCCGCAATCAAAGC
IL1A-Reverse	AATTTCACTGCCTCATCCAGGT
IL1B-Forward	CTACCCTCTCCAGCCAGTCTT
IL1B-Reverse	AGGTCATTATTGTTGTCACCGTA
CSF1-Forward	CTTTGTCTTGCGCCTGCTC
CSF1-Reverse	AAGGCTCTCGAAGGCTCCAC
IRG6-Forward	TAGACCGCCACAAAGACGTG
IRG6-Reverse	TCCGCCCGTTTCTACAGTTC
CXCL2-Forward	GCTAAACAAGAGCAGTGCCAAC
CXCL2-Reverse	CCAGGGGCTATTTGCTTCTCTT
CCL20-Forward	CAAGTCAGAAGCAGCAAGCAA
CCL20-Reverse	ATGTCACAAGCTTCATTGGCG
TRAPPC9-Forward	AGTGGGTGCAAGGAGATGTG
TRAPPC9-Reverse	TCAGCAGCCCCATGTTTTCA
CSF3-Forward	GGCCTGGAACCCAGAACCTAC
CSF3-Reverse	CCATCCAGAGTGCAATGTGCC
NFKBIA-Forward	GAGAAGGCACTGACCATGGAA
NFKBIA-Reverse	CCAAGTGGAGTGGAGTCTGC
IFIT1-Forward	TCTGGAAATCCACAAGACAGACT
IFIT1-Reverse	GCATTATTACTCATGGTTGCTGTGA
N-Forward	ACCAGTCCAGAGGCAAGGGACC
N-Reverse	CACAATTGCCGCTCACTAGGGG
RPL4-Forward	CAAGAGTAACTACAACCTTC
RPL4-Reverse	GAACTCTACGATGAATCTTC
